# Supplementary material for: Using phenolic polymers to control the size and morphology of calcium carbonate microparticles
Source: Royal Society of Chemistry journal article supplement (doi:10.1039/d3ra04791a), 2023-01-01
Supplement: d3ra04791a1.pdf [file d3ra04791a1.pdf]

## Supporting Information

### Using phenolic polymers to control the size and morphology of calcium carbonate microparticles

Yurie Nakanishi,<sup>a</sup> Bohan Cheng,<sup>a</sup> Joseph J. Richardson,<sup>a,b</sup> and Hirotaka Ejima<sup>\*a</sup>

<sup>a</sup> *Department of Materials Engineering, The University of Tokyo, 7-3-1 Hongo, Bunkyo-ku, Tokyo 113-8656, Japan*

<sup>b</sup> *School of Engineering, RMIT University, Melbourne, VIC 3000, Australia*

*\* Corresponding author*

Corresponding author E-mail: [ejima@g.ecc.u-tokyo.ac.jp](mailto:ejima@g.ecc.u-tokyo.ac.jp)

## CONTENTS

**Table S1.**  $M_n$  and PDI of the phenolic polymers.

**Table S2.** Sizes and standard deviations of  $\text{CaCO}_3$  particles prepared under various conditions.

**Fig. S1** (a) SEM image and (b) XRD pattern of  $\text{CaCO}_3$  particles obtained in the absence of phenolic polymers.

**Fig. S2** The optical microscopic image of  $\text{CaCO}_3$  particles synthesized in the presence of P4HS. Stirring speed is 500 rpm.

**Fig. S3** Magnified SEM images of  $\text{CaCO}_3$  particles, (a) non-cracked and (b) cracked, synthesized in the presence of P4HS. Stirring speed is 500 rpm.

**Fig. S4** SEM images of  $\text{CaCO}_3$  particles obtained in the presence of phenolic polymers. Stirring speed is 500 rpm.

**Fig. S5** The size distribution of  $\text{CaCO}_3$  particles obtained in the presence of phenolic polymers. (a) P1HS, (b) P2HS, (c) P3HS, (d) P4HS, and (e) P5HS. The stirring speed was 500 rpm.

**Fig. S6** XRD patterns of  $\text{CaCO}_3$  particles obtained in the presence of (a) P1HS, (b) P2HS, (c) P3HS, (d) P4HS. The stirring speed was 500 rpm.

**Fig. S7** TGA curves of the  $\text{CaCO}_3$  particles prepared with P1HS, P2HS, P3HS and P5HS (0.1 mg/mL).

**Fig. S8** (a) TGA curves of the five phenolic polymers and polystyrene (PS). (b) XRD patterns of P4HS before and after the calcination at 500°C for 2h.

**Fig. S9** (a), (b) Magnified SEM images of  $\text{CaCO}_3$  particles synthesized with P2HS (0.3 mg/mL). (c), (d) Magnified SEM images of  $\text{CaCO}_3$  particles after calcination synthesized with P5HS (0.1 mg/mL) with a stirring speed of 1000 rpm.

**Fig. S10** SEM images of  $\text{CaCO}_3$  particles obtained in the presence of phenolic polymers.

**Fig. S11** The size distribution of  $\text{CaCO}_3$  particles obtained in the presence of phenolic polymers. (a) P1HS, (b) P2HS, (c) P3HS, (d) P4HS, and (e) P5HS. The polymer concentrations were 0.1 mg/mL.

**Fig. S12** (a) SEM image and (b) XRD pattern of  $\text{CaCO}_3$  particles obtained in the absence of polymer at the temperature of 80°C.

**Fig. S13** XRD patterns of  $\text{CaCO}_3$  particles before and after calcination at 500°C for 2h. The  $\text{CaCO}_3$  particles were prepared with P4HS.

**Fig. S14** (a) SEM image and (b) XRD patterns of  $\text{CaCO}_3$  particles prepared in the presence of P4HS ( $M_n \sim 12\text{kDa}$ ). The data for  $M_n \sim 8\text{kDa}$  is the same as Fig. 1c but also shown here for comparison.

**Fig. S15** (a) SEM images and (b) XRD patterns of  $\text{CaCO}_3$  particles prepared in the presence of P4HS at different scale of reaction.

**Table S1.**  $M_n$  and PDI of the phenolic polymers.

| <b>Polymers</b> | <b><math>M_n</math> ( <math>\times 10^4</math>)</b> | <b>PDI</b> |
|-----------------|-----------------------------------------------------|------------|
| P1HS            | 7.2                                                 | 1.35       |
| P2HS            | 8.6                                                 | 1.23       |
| P3HS            | 8.0                                                 | 1.20       |
| P4HS            | 7.0                                                 | 1.37       |
| P5HS            | 14.0                                                | 1.68       |

**Table S2.** Sizes and standard deviations of CaCO<sub>3</sub> particles prepared under various conditions.

| Polymer | Stirring speed (rpm) | Polymer concentration (mg/mL) | Mean value (μm) | Standard deviation (μm) |
|---------|----------------------|-------------------------------|-----------------|-------------------------|
| P1HS    | 500                  | 0.1                           | 4.53            | 0.79                    |
| P1HS    | 500                  | 0.3                           | 2.17            | 0.42                    |
| P1HS    | 500                  | 0.5                           | 2.03            | 0.42                    |
| P1HS    | 1000                 | 0.1                           | 2.58            | 0.55                    |
| P1HS    | 1500                 | 0.1                           | 1.76            | 0.31                    |
| P2HS    | 500                  | 0.1                           | 6.24            | 0.70                    |
| P2HS    | 500                  | 0.3                           | 6.00            | 0.62                    |
| P2HS    | 500                  | 0.5                           | 5.79            | 0.46                    |
| P2HS    | 1000                 | 0.1                           | 4.52            | 0.61                    |
| P2HS    | 1500                 | 0.1                           | 3.26            | 0.49                    |
| P3HS    | 500                  | 0.1                           | 7.45            | 0.81                    |
| P3HS    | 500                  | 0.3                           | 7.40            | 0.64                    |
| P3HS    | 500                  | 0.5                           | 5.79            | 0.60                    |
| P3HS    | 1000                 | 0.1                           | 6.33            | 0.57                    |
| P3HS    | 1500                 | 0.1                           | 4.09            | 0.41                    |
| P4HS    | 500                  | 0.1                           | 9.04            | 0.71                    |
| P4HS    | 500                  | 0.3                           | 6.05            | 0.91                    |
| P4HS    | 500                  | 0.5                           | 4.98            | 0.67                    |
| P4HS    | 1000                 | 0.1                           | 4.42            | 0.65                    |
| P4HS    | 1500                 | 0.1                           | 3.56            | 0.71                    |
| P5HS    | 500                  | 0.1                           | 7.16            | 0.65                    |
| P5HS    | 500                  | 0.3                           | 5.72            | 0.61                    |
| P5HS    | 500                  | 0.5                           | 4.94            | 0.59                    |
| P5HS    | 1000                 | 0.1                           | 4.42            | 0.65                    |
| P5HS    | 1500                 | 0.1                           | 3.56            | 0.71                    |



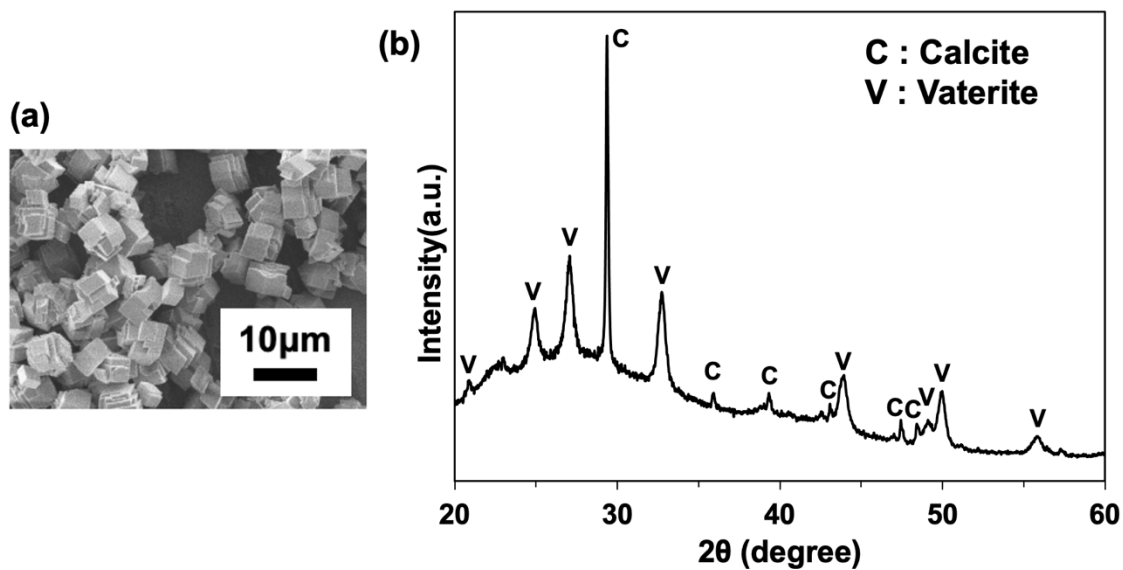

**Fig. S1** (a) SEM image and (b) XRD pattern of  $\text{CaCO}_3$  particles obtained in the absence of phenolic polymers.

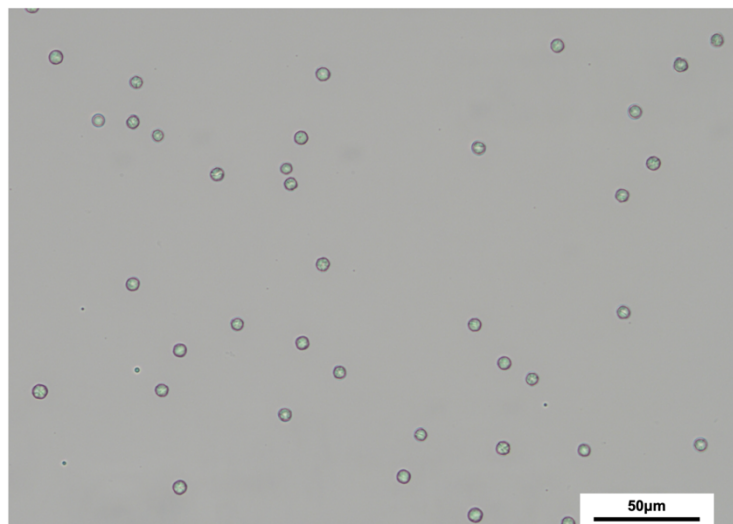

**Fig. S2** The optical microscope image of  $\text{CaCO}_3$  particles synthesized in the presence of P4HS. Stirring speed is 500 rpm.

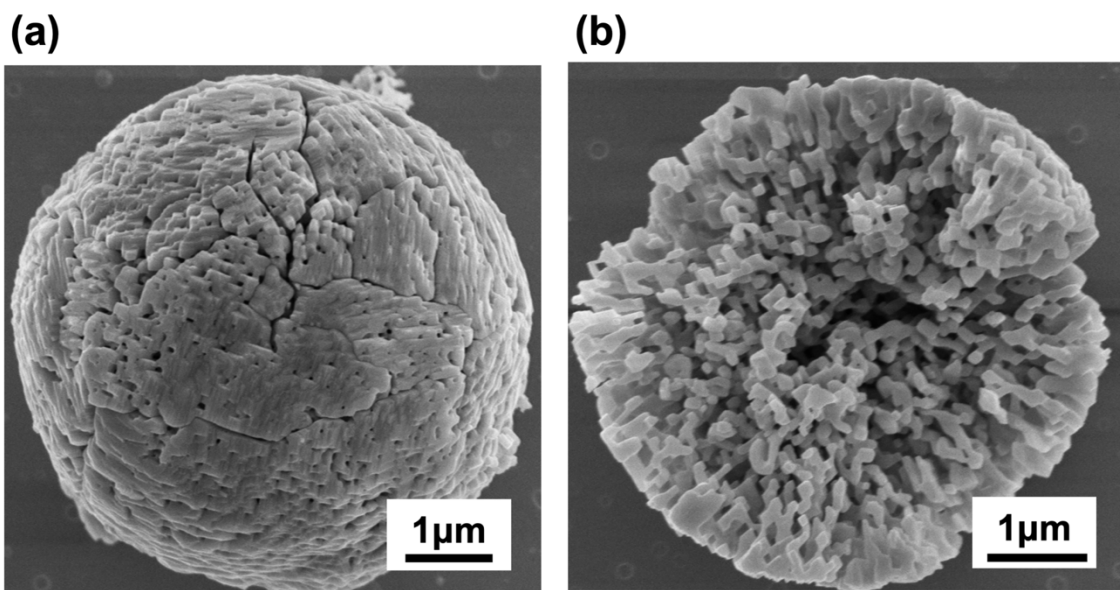

**Fig. S3** Magnified SEM images of CaCO<sub>3</sub> particles, non-cracked (a) and cracked (b), synthesized in the presence of P4HS. Stirring speed is 500 rpm.

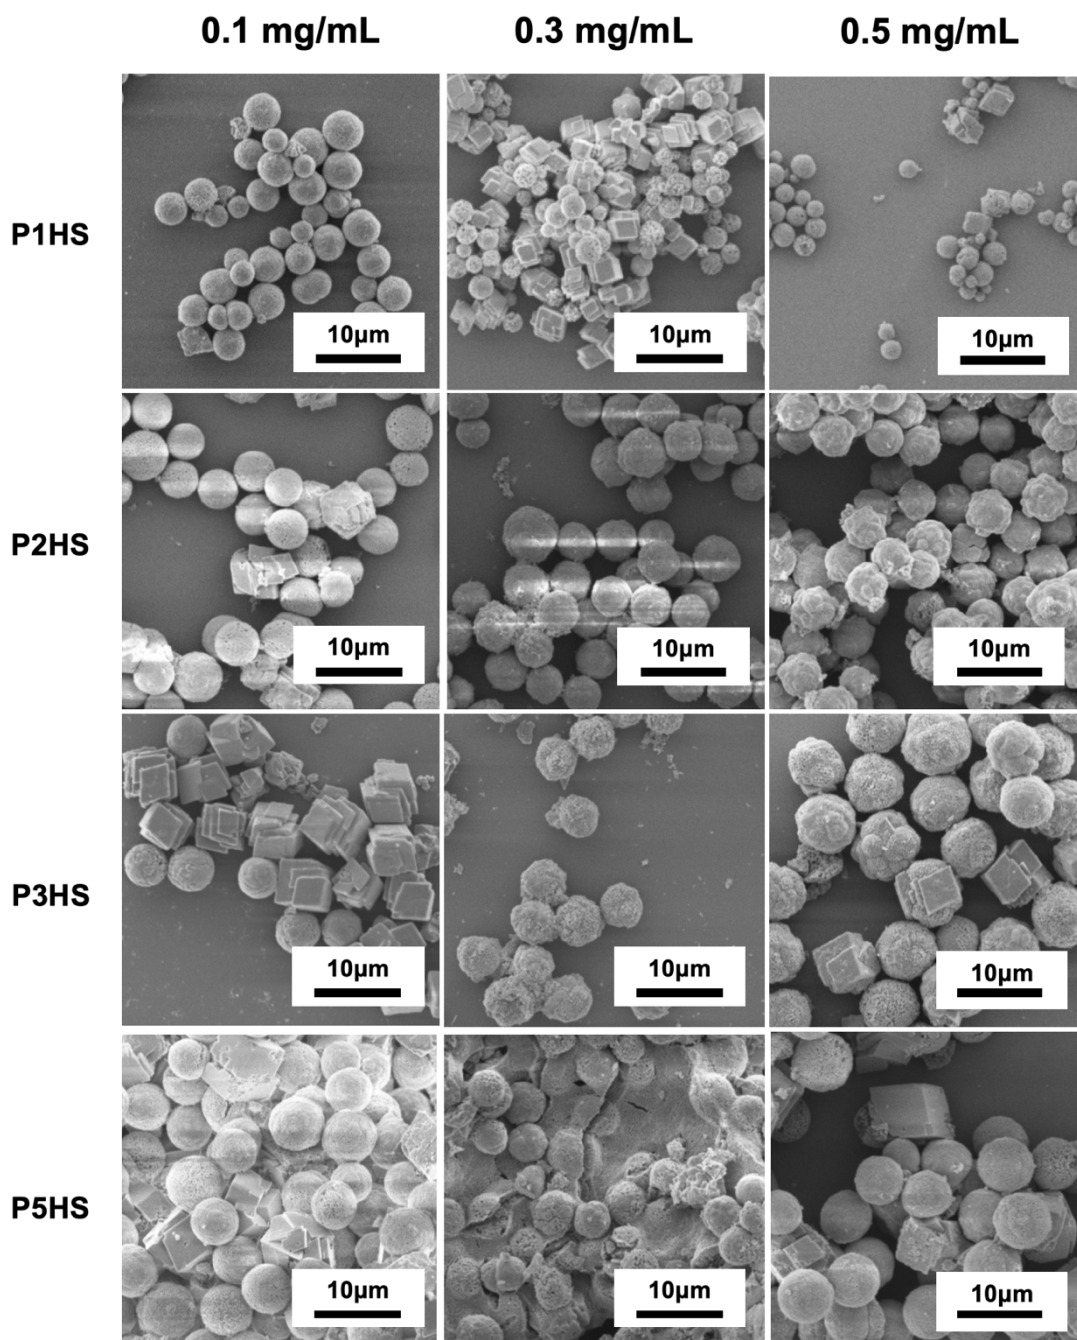

**Fig. S4** SEM images of  $\text{CaCO}_3$  particles obtained in the presence of phenolic polymers. Stirring speed is 500 rpm.

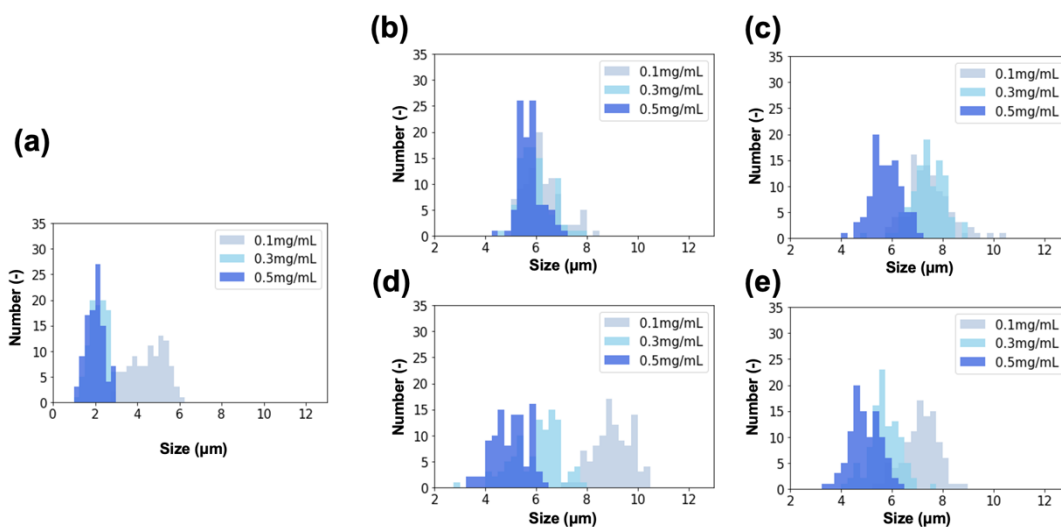

**Fig. S5** The size distribution of  $\text{CaCO}_3$  particles obtained in the presence of phenolic polymers. (a) P1HS, (b) P2HS, (c) P3HS, (d) P4HS, and (e) P5HS. The stirring speed was 500 rpm.

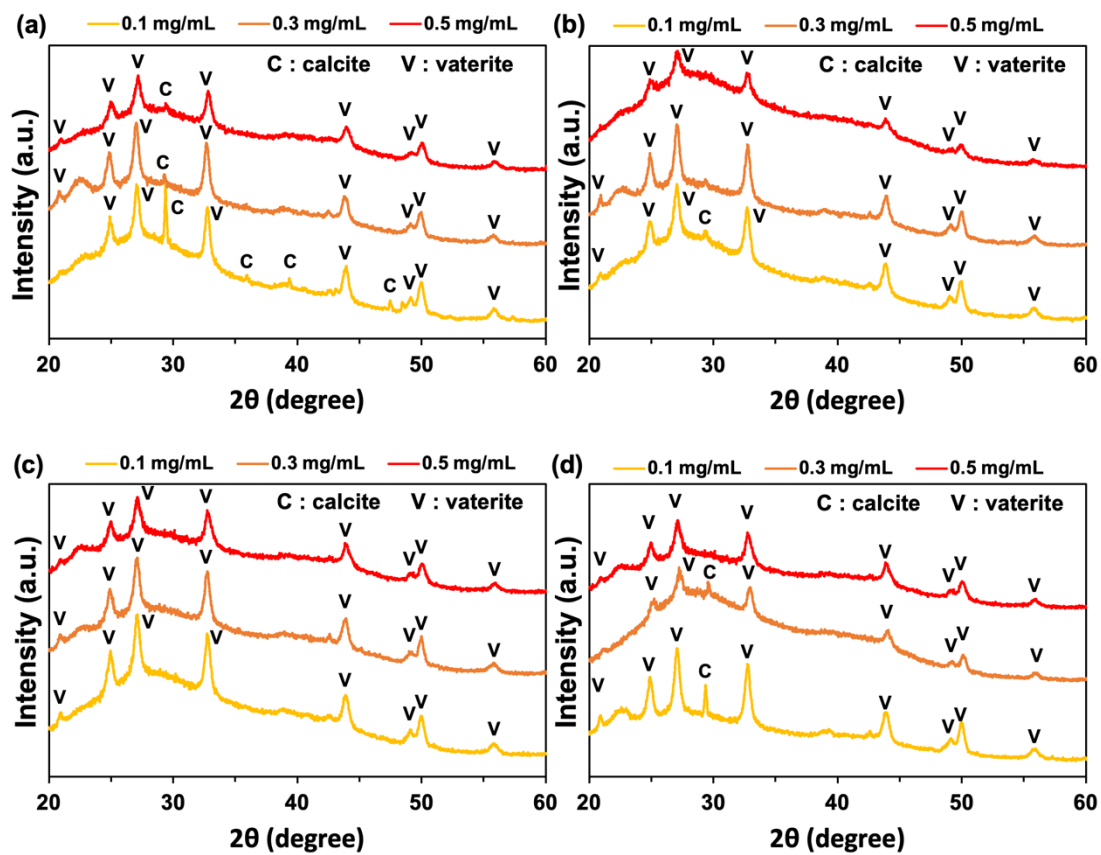

**Fig. S6** XRD patterns of  $\text{CaCO}_3$  particles obtained in the presence of (a) P1HS, (b) P2HS, (c) P3HS, (d) P4HS. The stirring speed was 500 rpm.

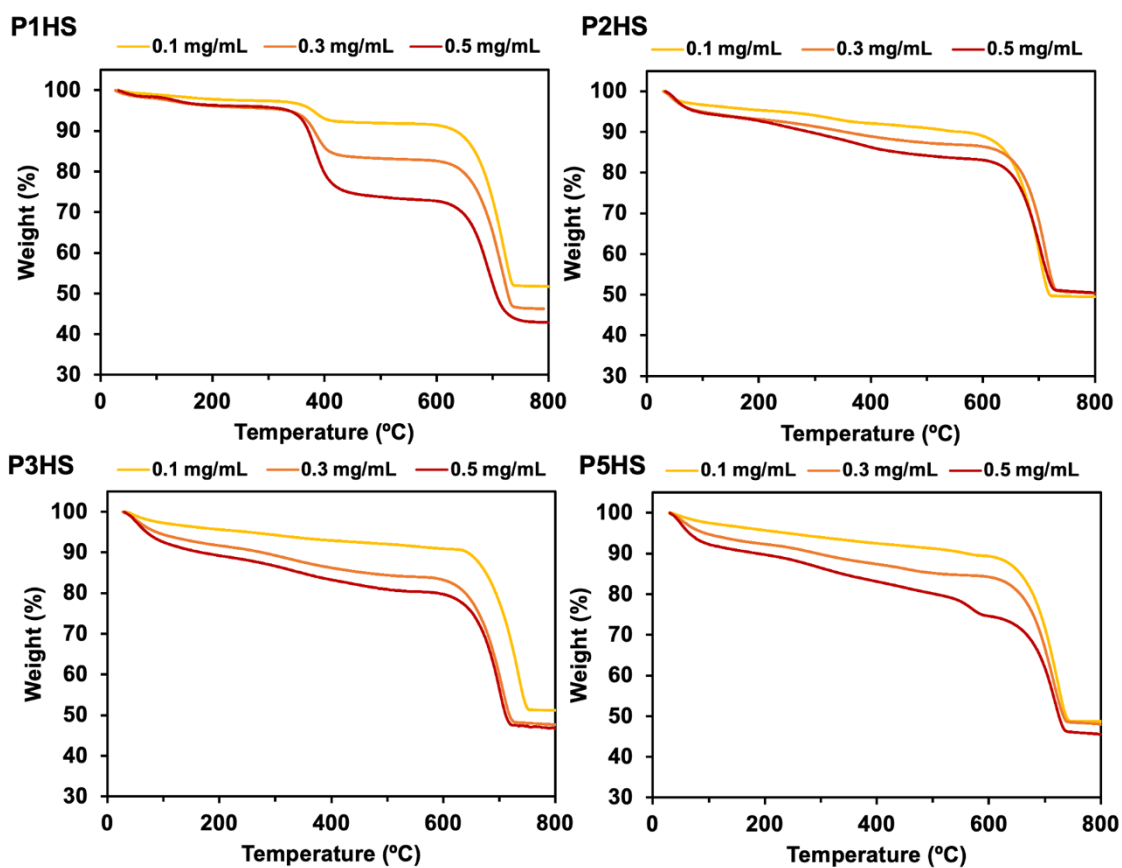

**Fig. S7** TGA curves of the CaCO<sub>3</sub> particles prepared with P1HS, P2HS, P3HS and P5HS (0.1 mg/mL).

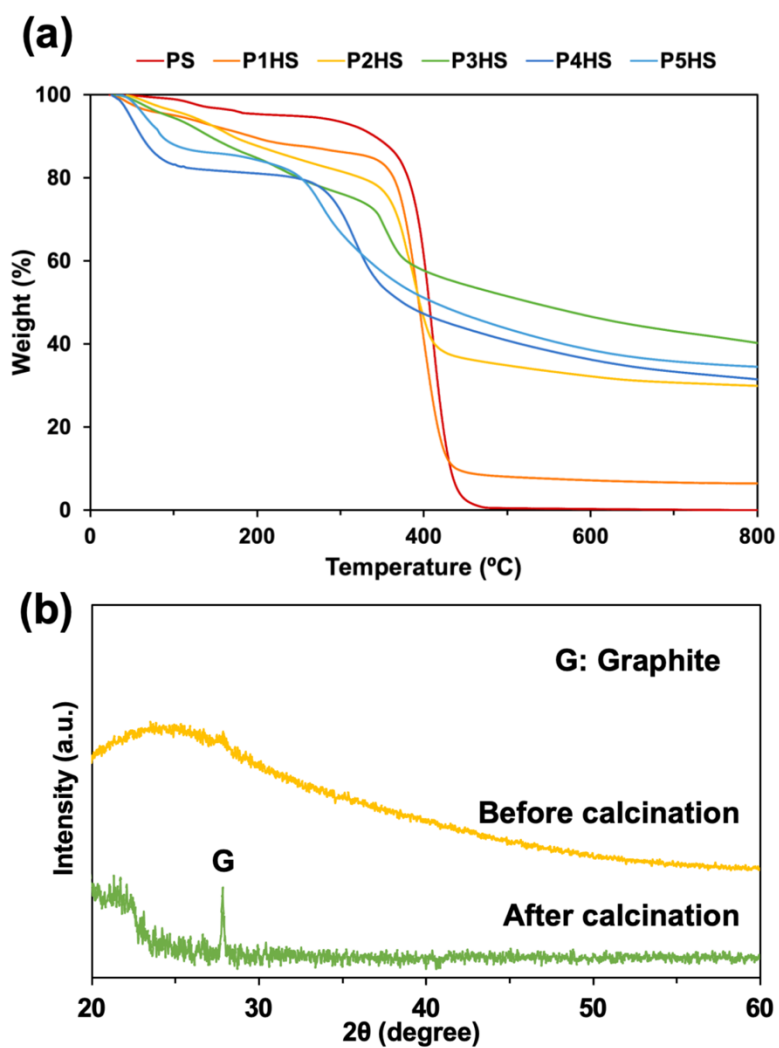

**Fig. S8** (a) TGA curves of the five phenolic polymers and polystyrene (PS). (b) XRD patterns of P4HS before and after the calcination at 500°C for 2h.



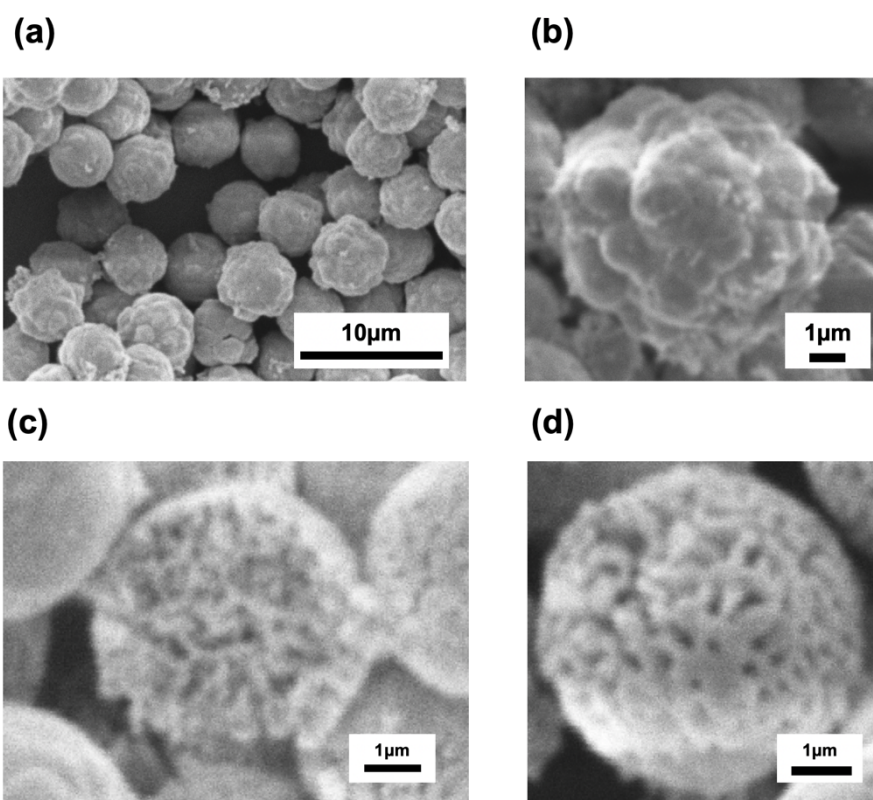

**Fig. S9** (a), (b) Magnified SEM images of  $\text{CaCO}_3$  particles synthesized with P2HS (0.3 mg/mL). (c), (d) Magnified SEM images of  $\text{CaCO}_3$  particles after calcination synthesized with P5HS (0.1 mg/mL) with a stirring speed of 1000 rpm.

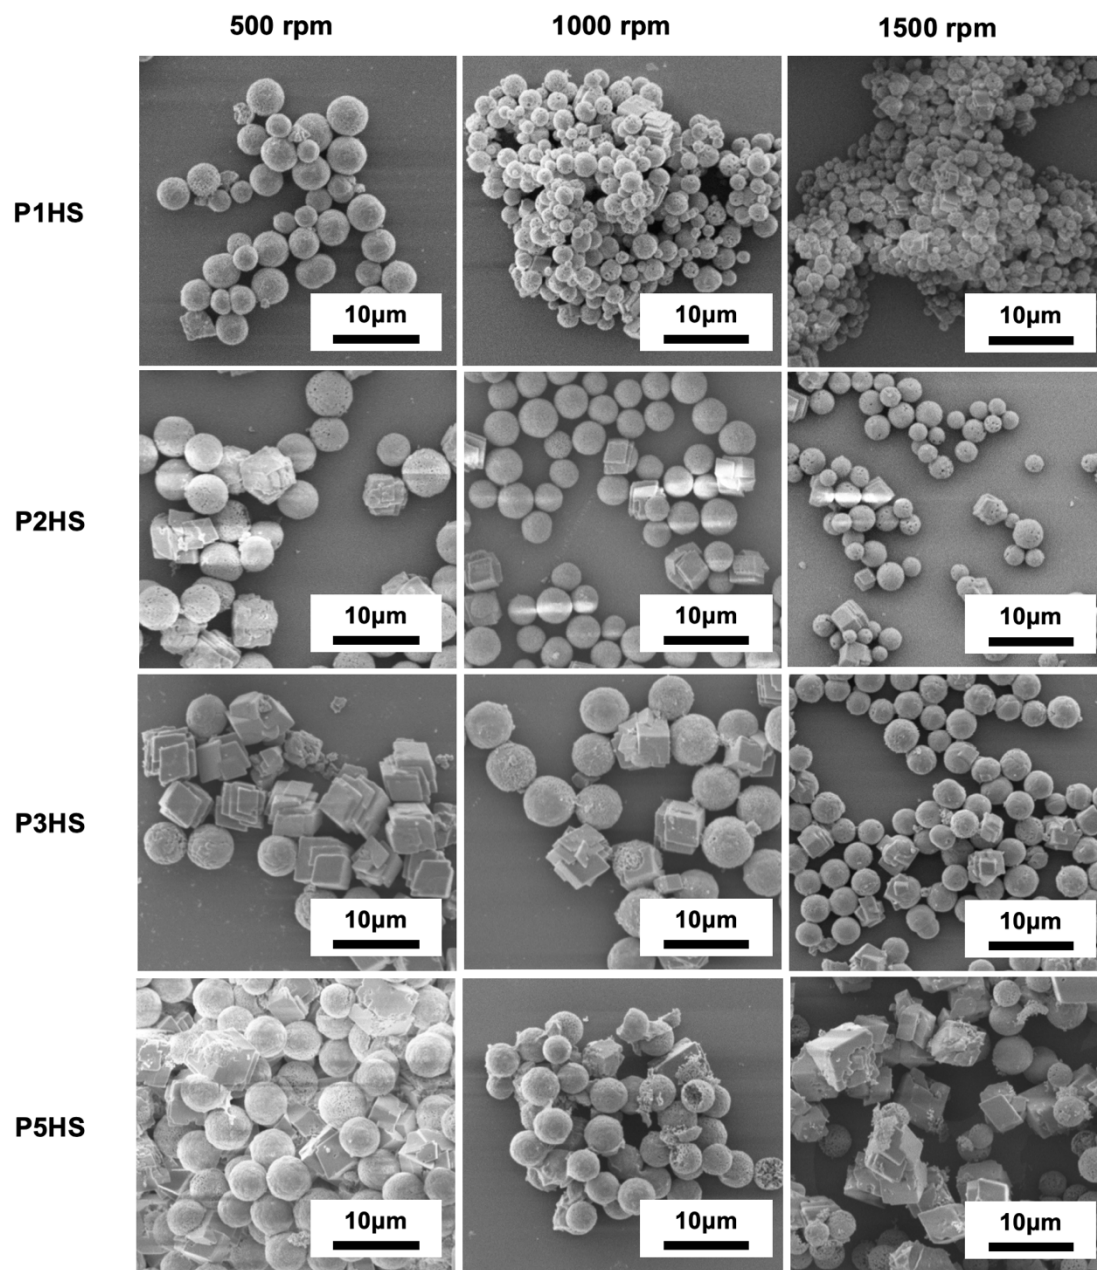

**Fig. S10** SEM images of  $\text{CaCO}_3$  particles obtained in the presence of phenolic polymers.

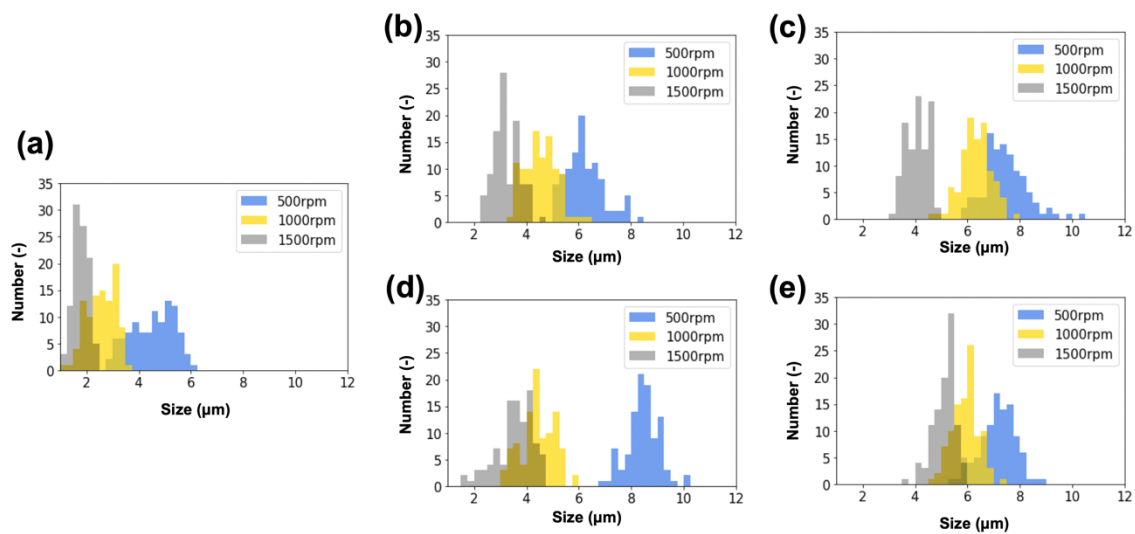

**Fig. S11** The size distribution of  $\text{CaCO}_3$  particles obtained in the presence of phenolic polymers. (a) P1HS, (b) P2HS, (c) P3HS, (d) P4HS, and (e) P5HS. The polymer concentrations were 0.1 mg/mL.

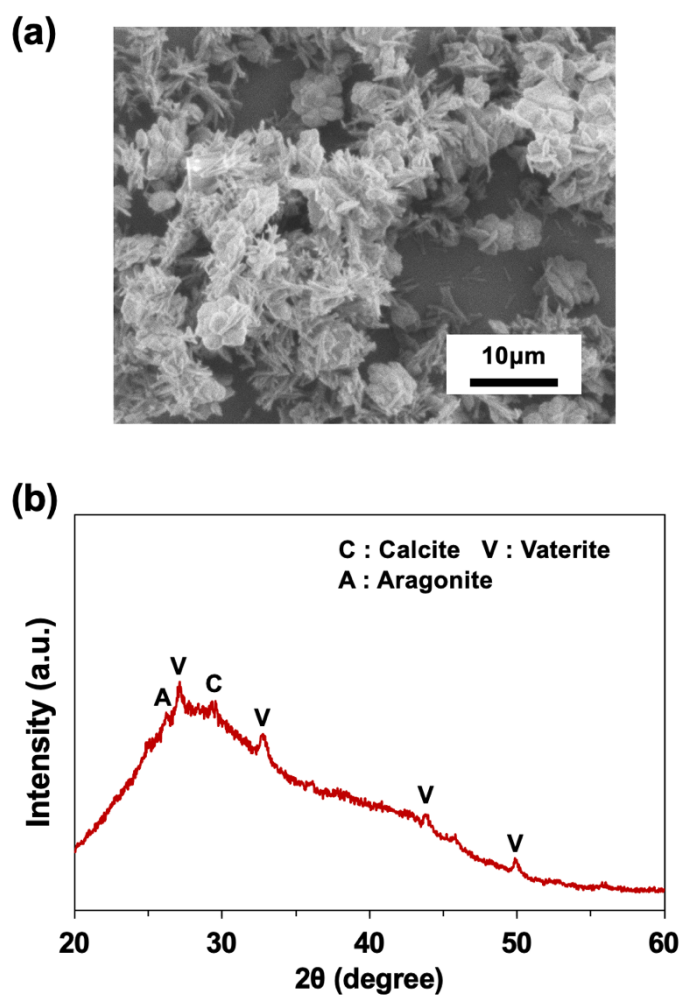

**Fig. S12** (a) SEM image and (b) XRD pattern of CaCO<sub>3</sub> particles obtained in the absence of polymer at the temperature of 80°C.

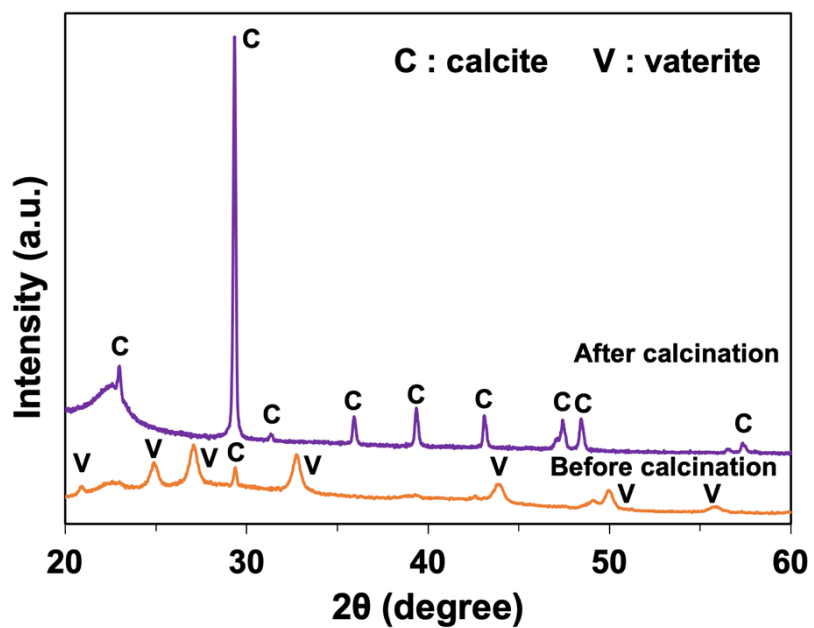

**Fig. S13** XRD patterns of  $\text{CaCO}_3$  particles before and after calcination at  $500^\circ\text{C}$  for 2h. The  $\text{CaCO}_3$  particles were prepared with P4HS.

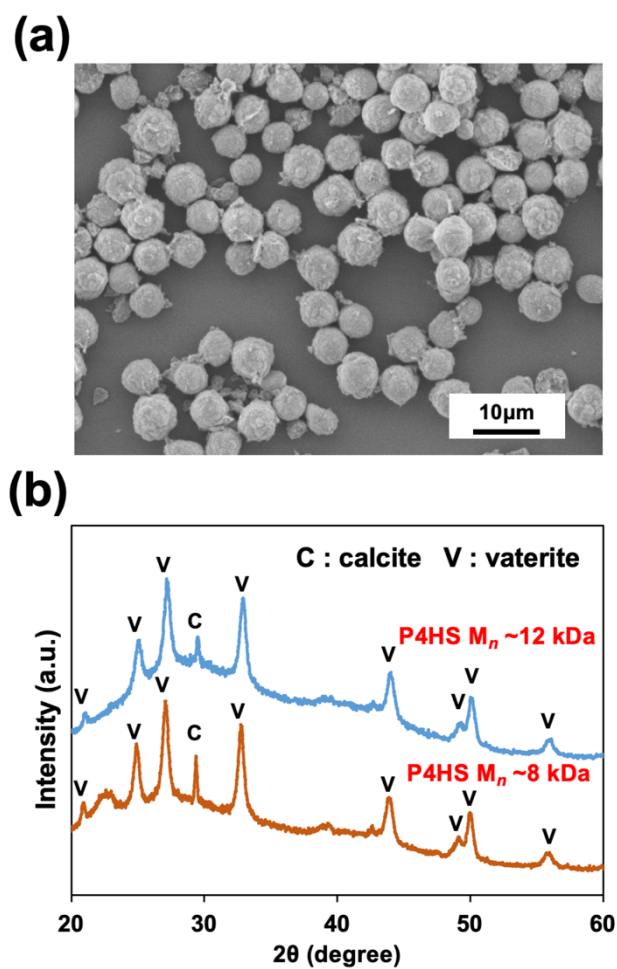

**Fig. S14** (a) SEM image and (b) XRD patterns of  $\text{CaCO}_3$  particles prepared in the presence of P4HS ( $M_n$  ~12kDa). The data for  $M_n$  ~8 kDa is the same as Fig. 1c but also shown here for comparison.

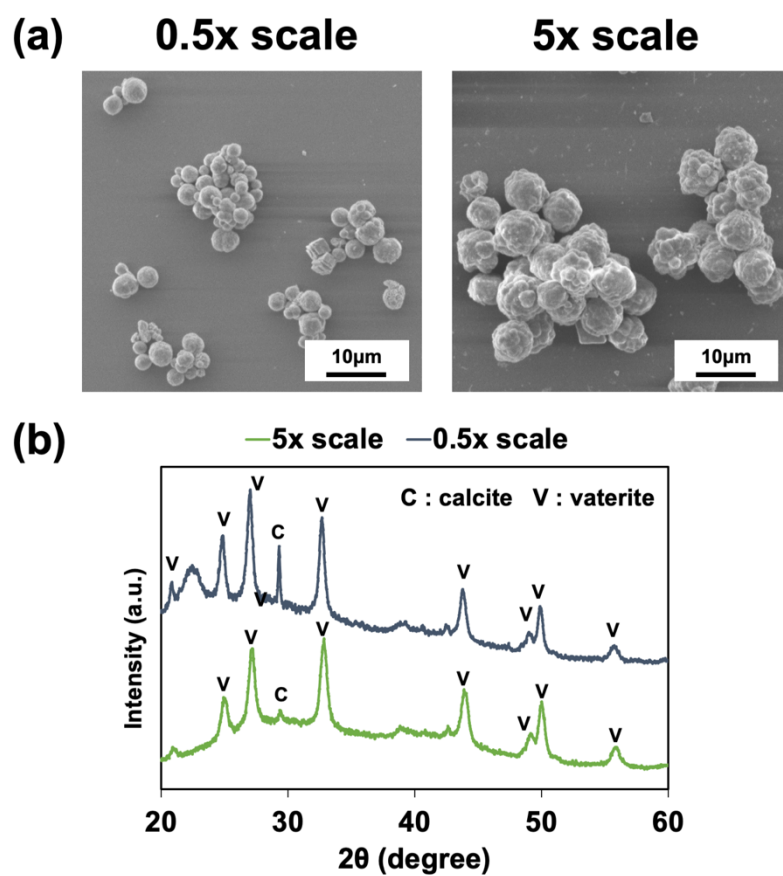

**Fig. S15** (a) SEM images and (b) XRD patterns of  $\text{CaCO}_3$  particles prepared in the presence of P4HS at different scale of reaction.
